# Supplementary material
Source: Springer Nature journal article supplement (https://www.springermedizin.de/resource/supplementary/13054_2012_1921_MOESM2_ESM.pdf/9711884)
Supplement: MOESM2 [file 9711884]

Highest RIFLE score after start ECMO

Last RIFLE score before stop ECMO or ECMO day 12

*Non-AKI*

S n=69

N-S n=20

n=89

*Non-AKI*

S n=96

N-S n=30

n=35

n=2

*Risk*

S n=59

N-S n=13

n=37

*Risk*

S n=57

N-S n=9

n=28

n=1

*Injury*

S n=42

N-S n=13

n=25

*Injury*

S n=21

N-S n=9

n=5

*Failure*

S n=9

N-S n=17

n=20

*Failure*

S n=5

N-S n=15
